# Supplementary material for: An Immune-Related Prognostic Signature for Predicting Clinical Outcomes and Immune Landscape in IDH-Mutant Lower-Grade Gliomas
Source: Hindawi journal article supplement (doi:10.1155/2021/3766685), 2021-12-18
Supplement: f1 [file 3766685.f1.zip]

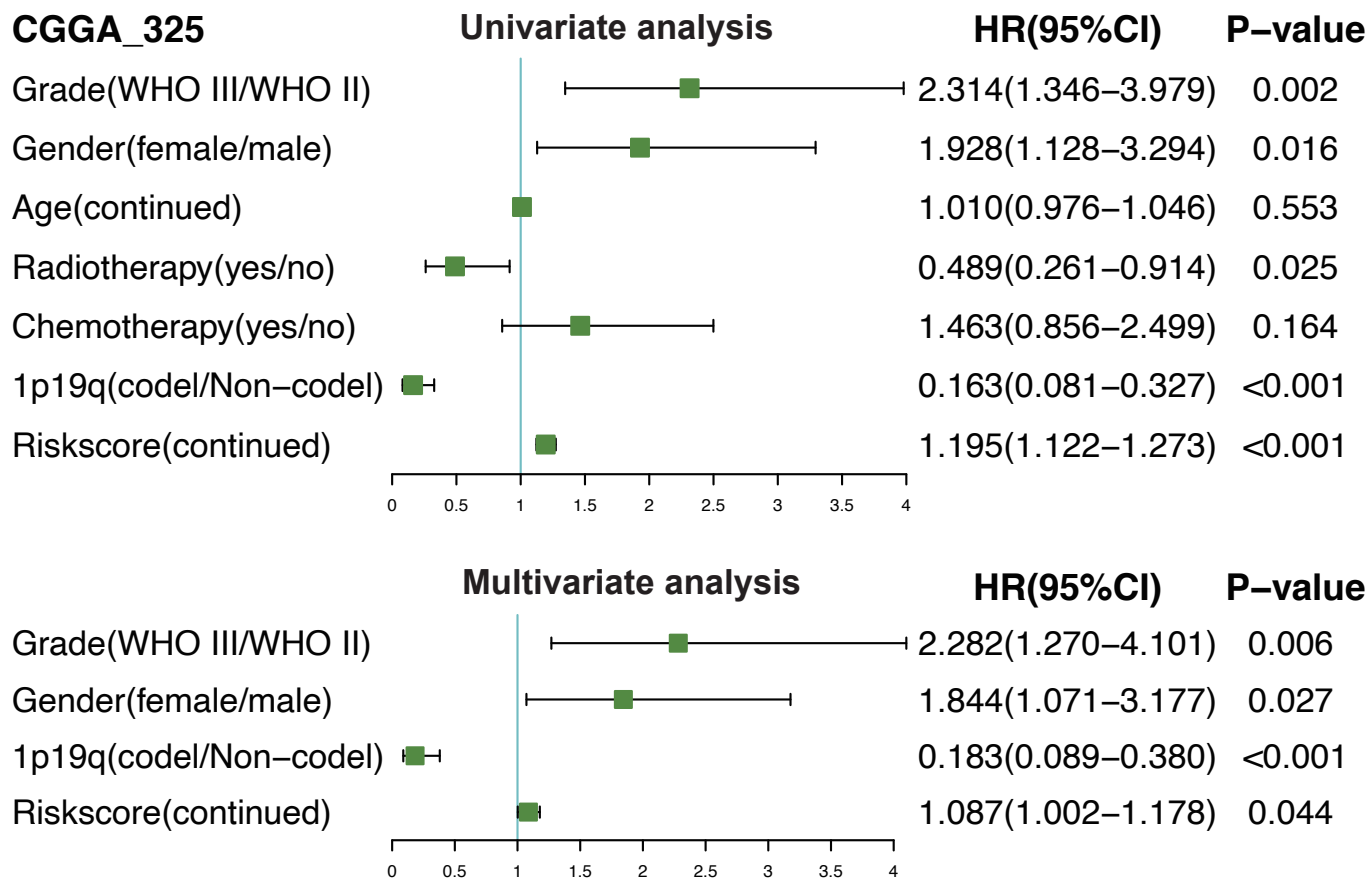

**Figure S7.** Univariate and multivariate Cox analyses showed that the risk signature was significantly correlated with OS in the CGGA\_325 cohort.
