# Supplementary material for: An Immune-Related Prognostic Signature for Predicting Clinical Outcomes and Immune Landscape in IDH-Mutant Lower-Grade Gliomas
Source: Hindawi journal article supplement (doi:10.1155/2021/3766685), 2021-12-18
Supplement: f1 [file 3766685.f1.zip]

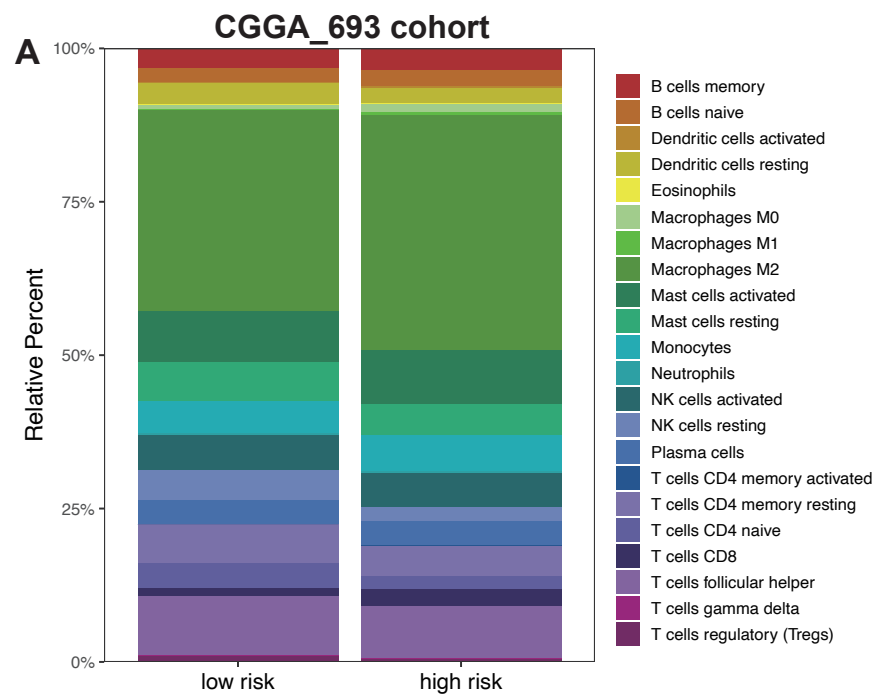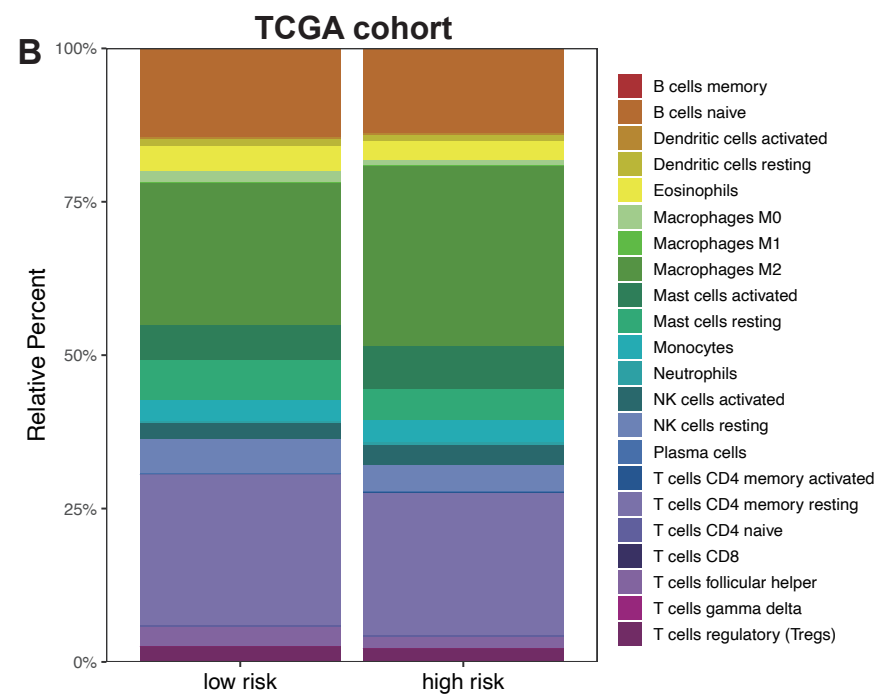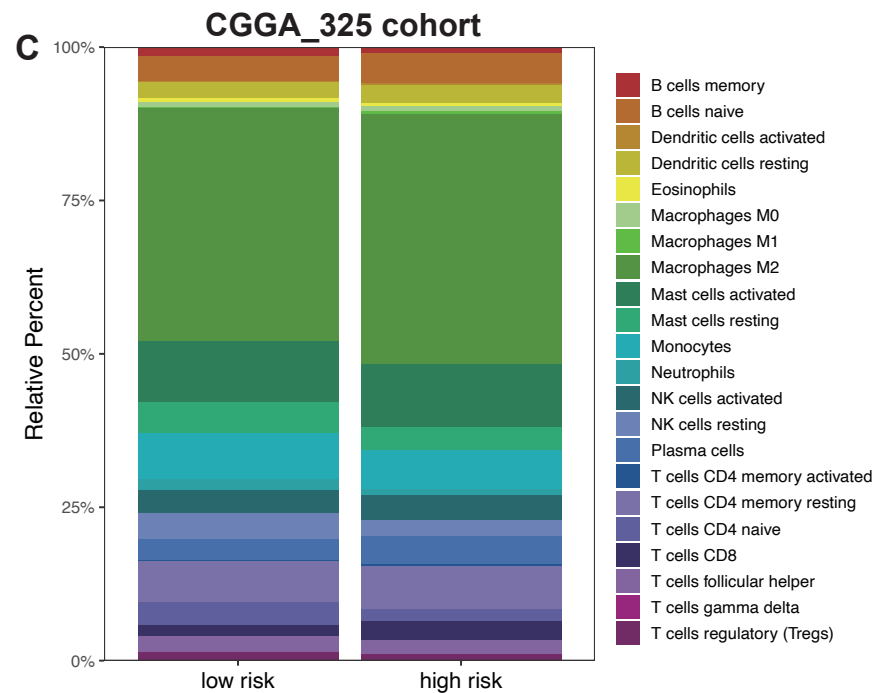

**Figure S8.** Distribution of 22 immune cells between low- and high-risk groups. Proportions of immune cells based on risk groups in CGGA\_693 (A), TCGA (B), and CGGA\_325 cohorts (C).
