# Supplementary material for: An Immune-Related Prognostic Signature for Predicting Clinical Outcomes and Immune Landscape in IDH-Mutant Lower-Grade Gliomas
Source: Hindawi journal article supplement (doi:10.1155/2021/3766685), 2021-12-18
Supplement: f1 [file 3766685.f1.zip]

Table S1: Exhausted T cell related gene list.

---

**Genes List**

---

BATF

BTLA

CD160

CD244

CD274

CD276

CD40

CEACAM1

CTLA4

CXCR5

EOMES

FOXO1

FOXP3

GRB2

HAVCR2

ICOS

IDO1

IL10

IRF4

LAG3

MKI67

NFATC1

NFATC2IP

NFATC3

NFATC4

NFKB1

NFKB2

PDCD1

PLCG1

PLCG2

PRDM1

SATB1

TCF7

TGFB1

TIGIT

TNFRSF14

TNFRSF9

TOX

YY1

---
