# Supplementary material for: An Immune-Related Prognostic Signature for Predicting Clinical Outcomes and Immune Landscape in IDH-Mutant Lower-Grade Gliomas
Source: Hindawi journal article supplement (doi:10.1155/2021/3766685), 2021-12-18
Supplement: f1 [file 3766685.f1.zip]

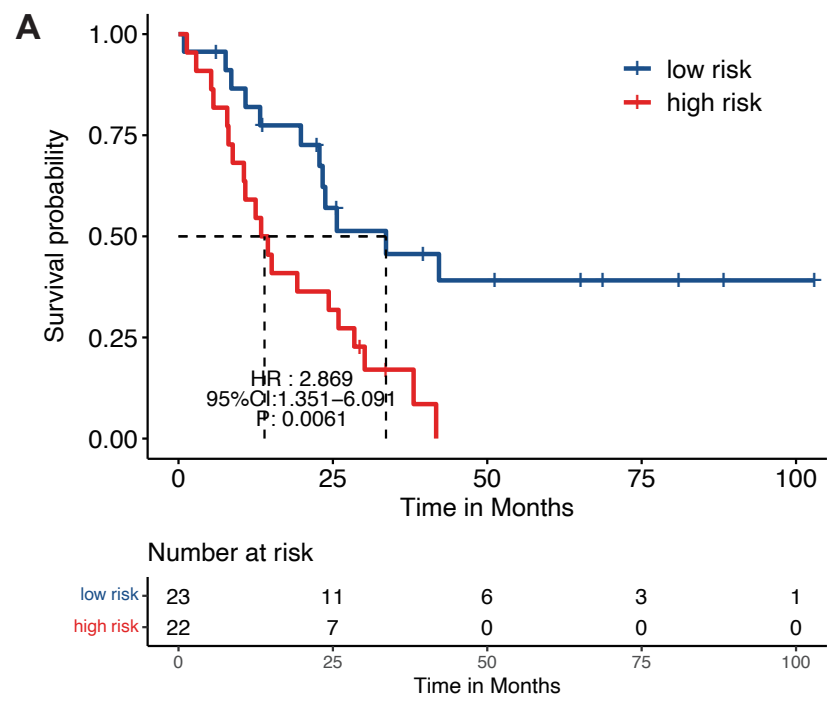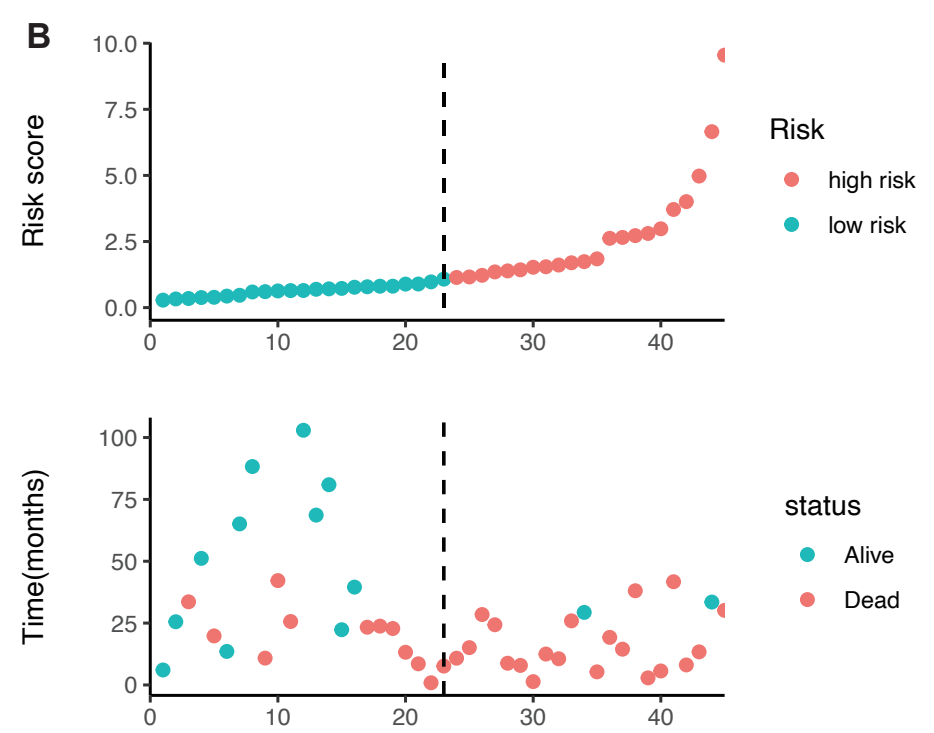

**Time dependent ROC**

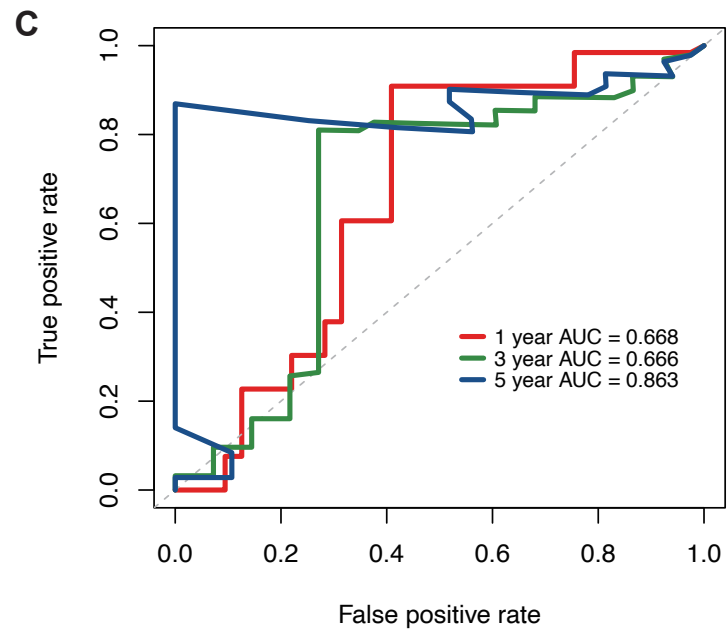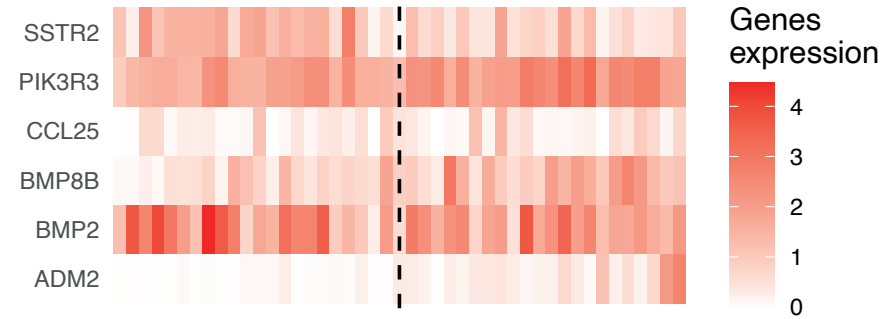

**Figure S1.** Validation of the six-genes signature in IDH-mutant GBM patients. **(A)** Kaplan–Meier survival analysis for IDH-mutant GBM patients based on the risk signature in CGGA\_693 cohort. **(B)** Risk scores distribution, survival status of each patient, and expression profile of the six-genes signature in IDH-mutant GBM patients. **(C)** The time-dependent ROC curve of the six-genes signature in IDH-mutant GBM patients.
