# Supplementary material for: An Immune-Related Prognostic Signature for Predicting Clinical Outcomes and Immune Landscape in IDH-Mutant Lower-Grade Gliomas
Source: Hindawi journal article supplement (doi:10.1155/2021/3766685), 2021-12-18
Supplement: f1 [file 3766685.f1.zip]

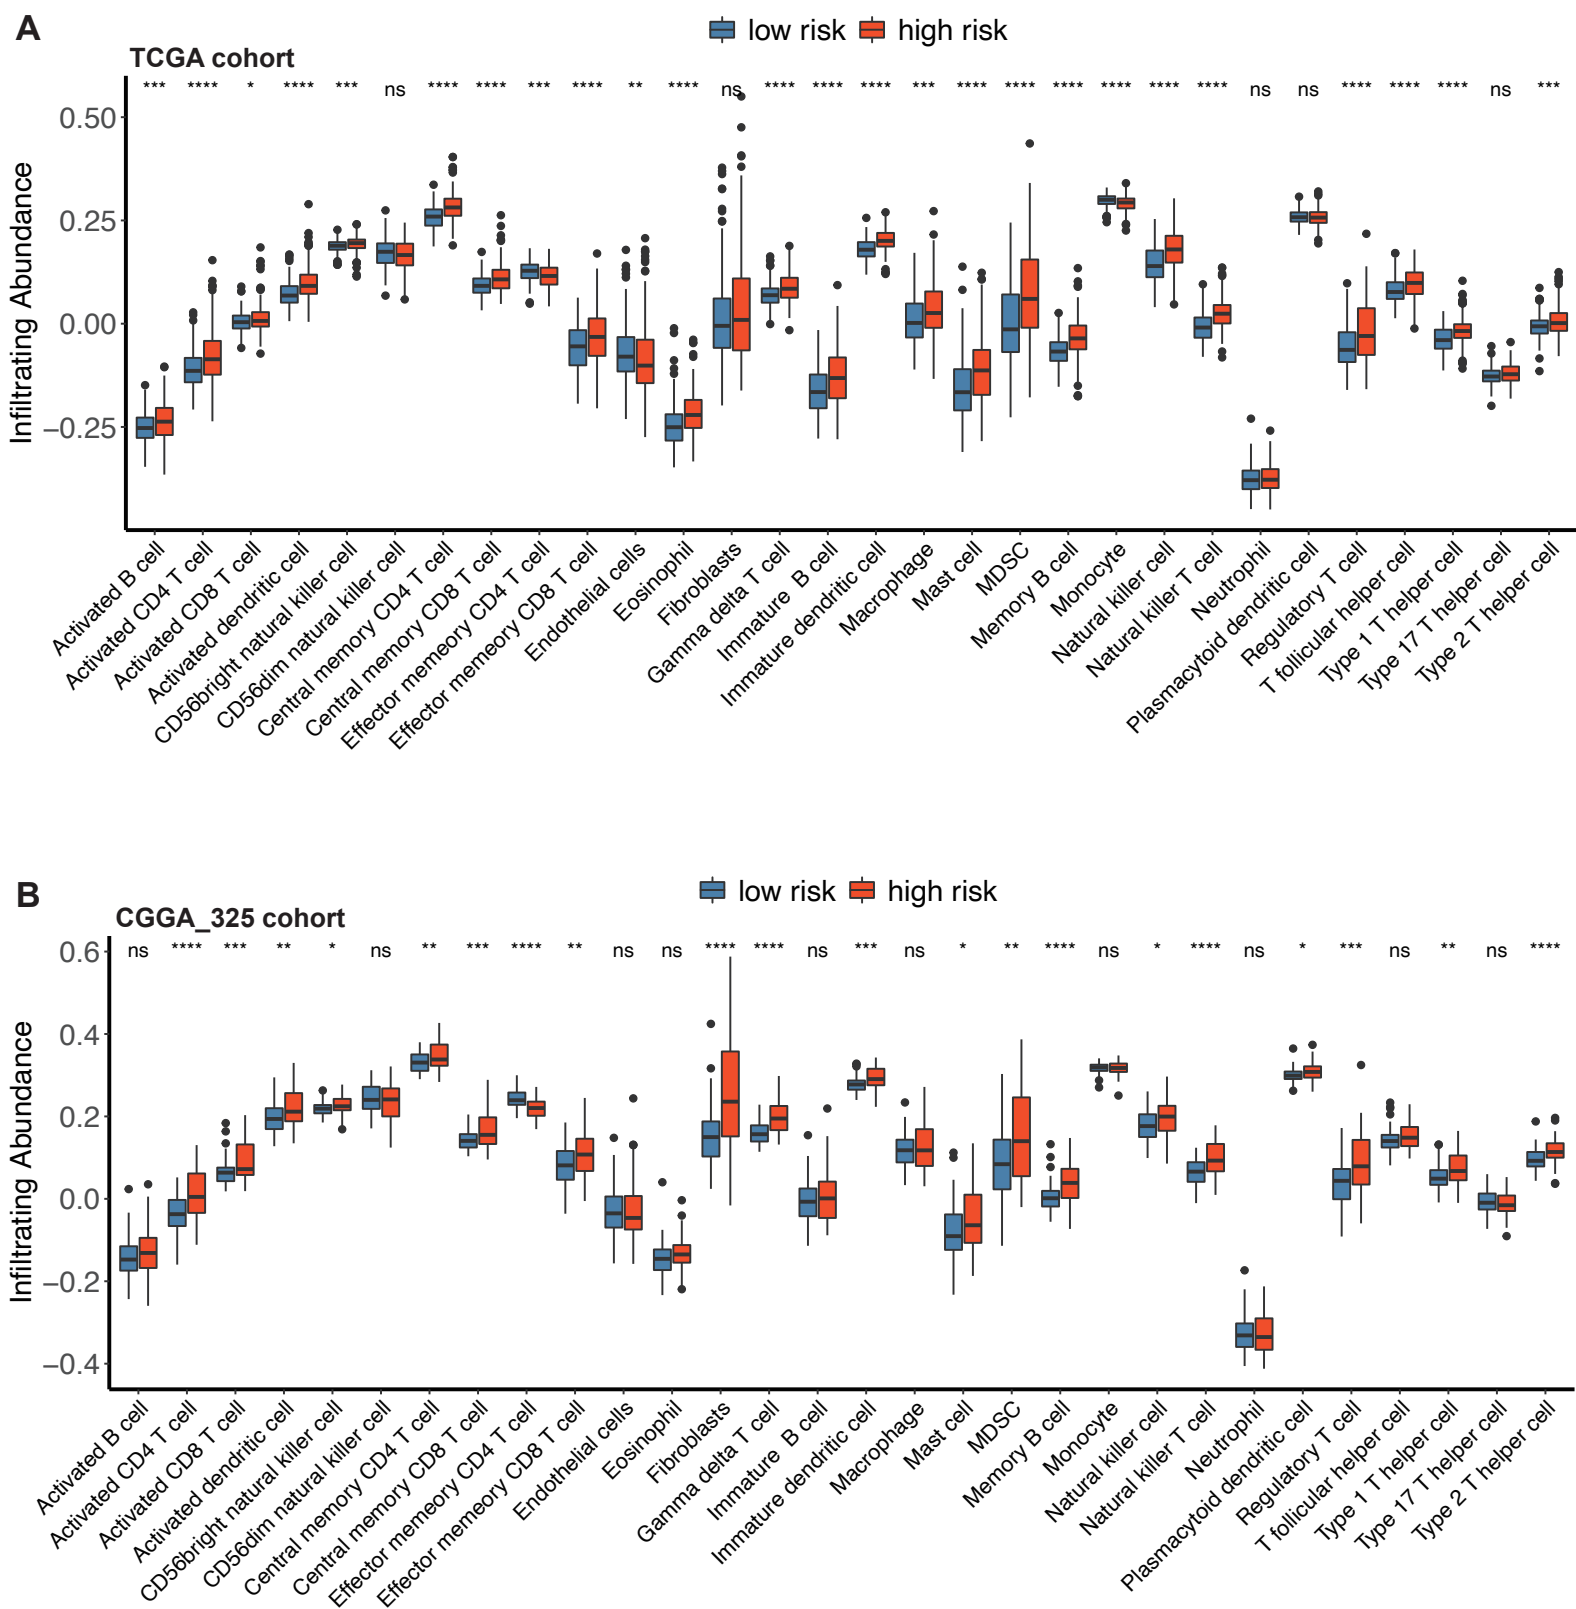

**Figure S4.** The infiltrating difference of 30 immune cells and stromal cells between the two groups in TCGA (**A**) and CGGA325 cohorts (**B**).
