# Supplementary material for: An Immune-Related Prognostic Signature for Predicting Clinical Outcomes and Immune Landscape in IDH-Mutant Lower-Grade Gliomas
Source: Hindawi journal article supplement (doi:10.1155/2021/3766685), 2021-12-18
Supplement: f1 [file 3766685.f1.zip]

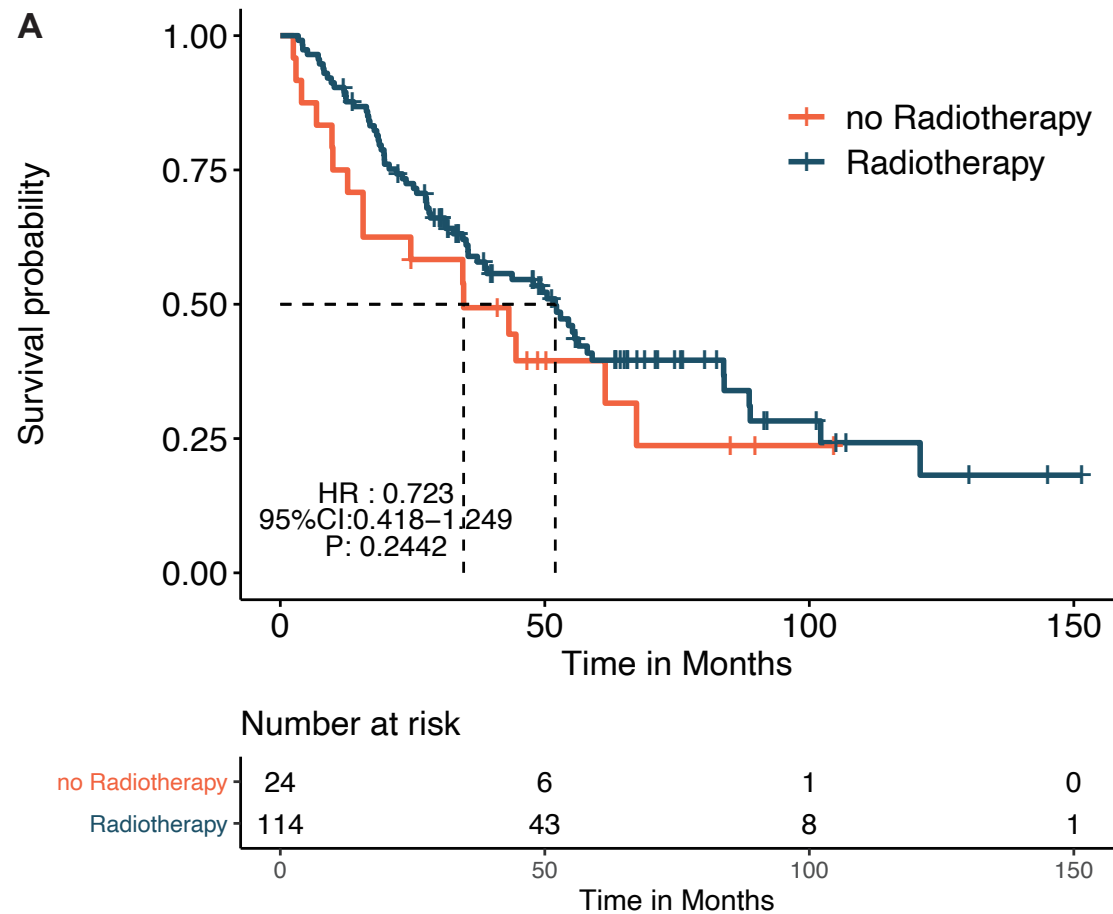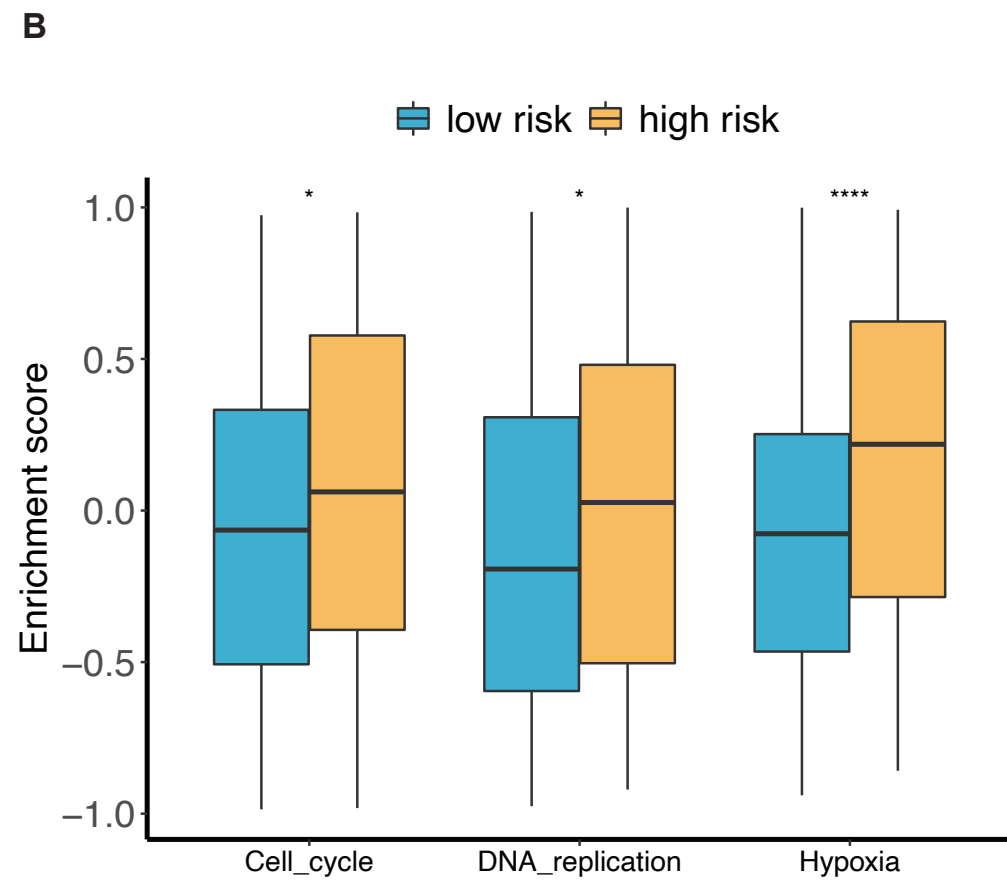

**Figure S3. (A)** Kaplan–Meier survival analysis for the high-risk patients based on treated and untreated radiotherapy. **(B)** Role of the six-genes signature in predicting therapeutic responses to radiotherapy in IDH-mutant LGGs.
