# Supplementary material for: An Immune-Related Prognostic Signature for Predicting Clinical Outcomes and Immune Landscape in IDH-Mutant Lower-Grade Gliomas
Source: Hindawi journal article supplement (doi:10.1155/2021/3766685), 2021-12-18
Supplement: f1 [file 3766685.f1.zip]

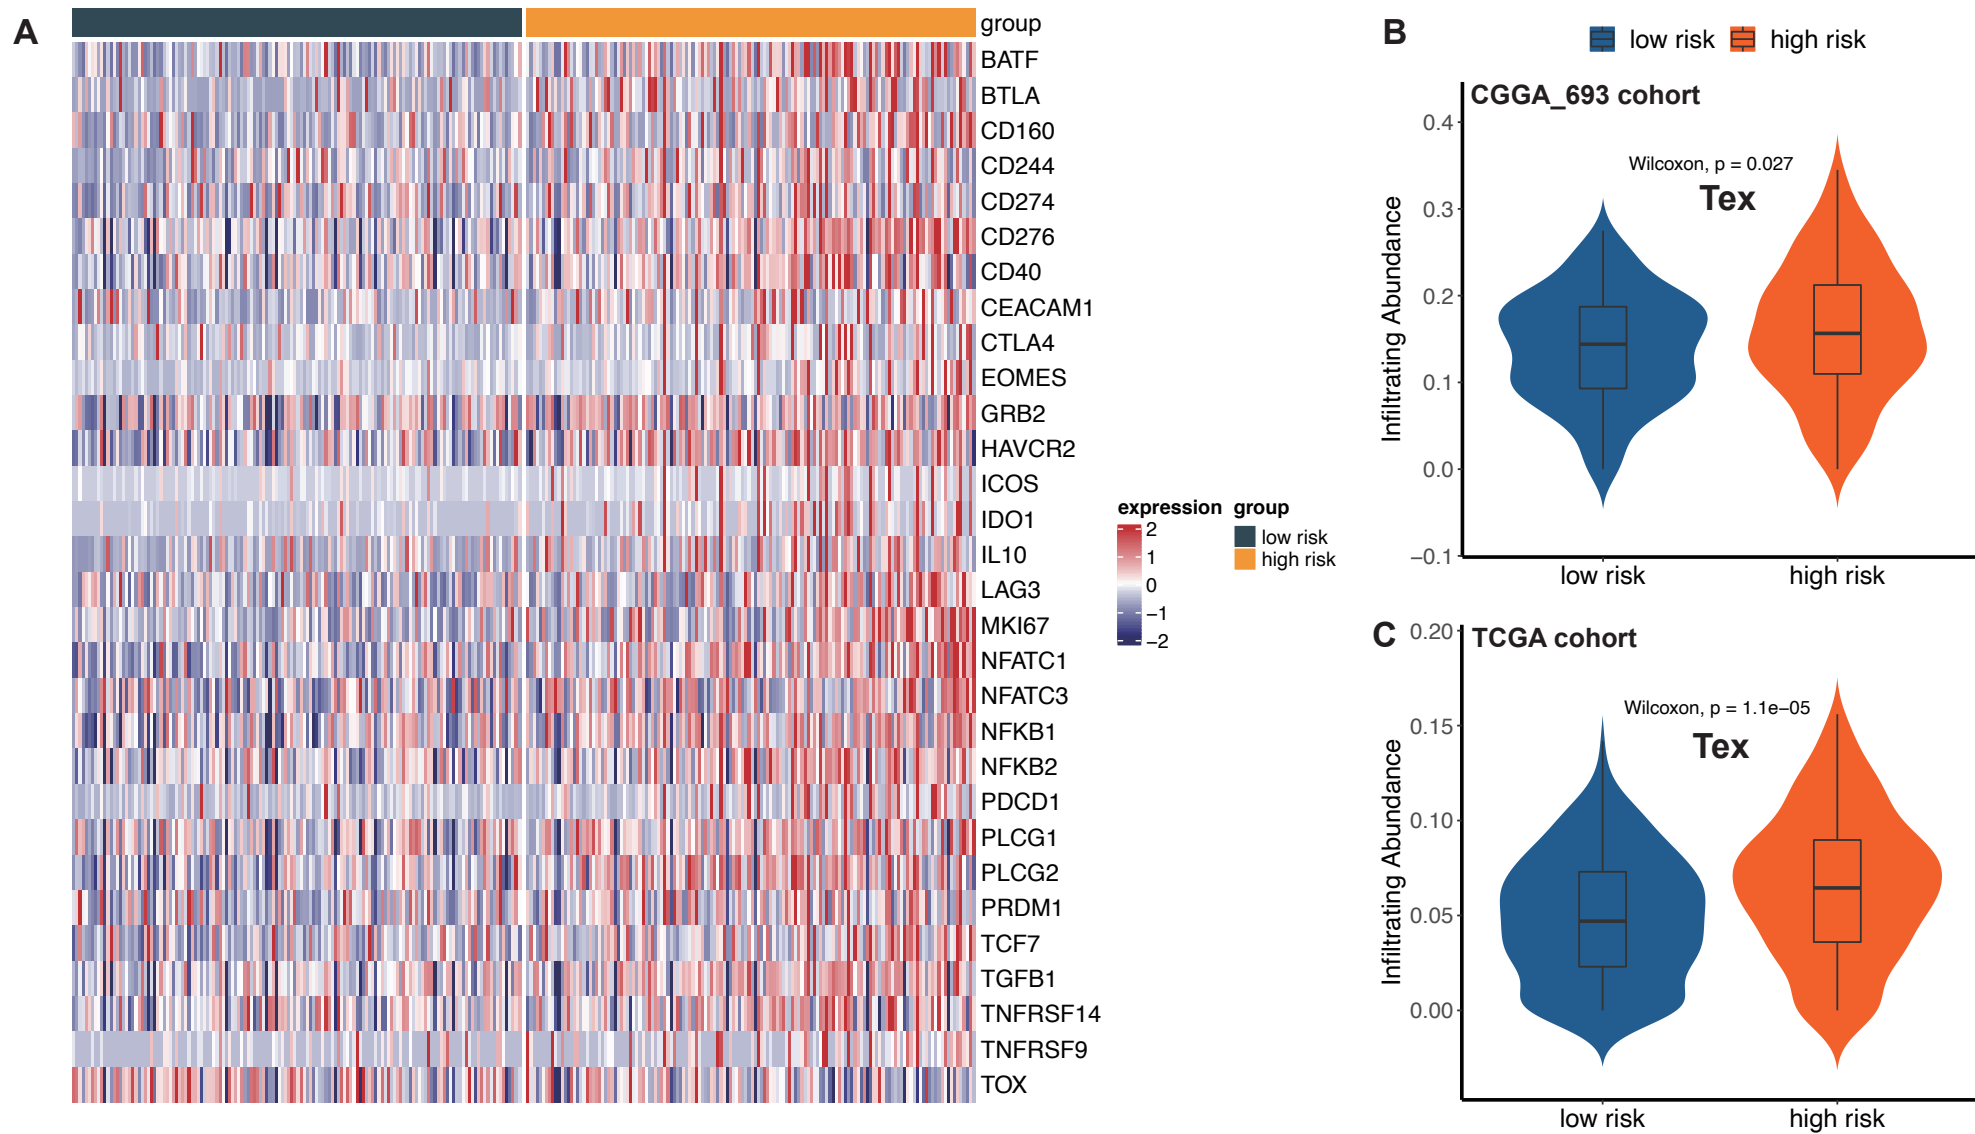

**Figure S5.** (A) Heatmap of T-cell exhaustion-related genes in low- and high-risk group. (B,C) The infiltrating difference of exhausted T cells between low- and high-risk group in CGGA693 and TCGA cohorts.
